# Supplementary material for: Chromogranin A deficiency attenuates tauopathy by altering epinephrine–alpha-adrenergic receptor signaling in PS19 mice
Source: Springer Nature journal article supplement (doi:10.1038/s41467-025-59682-6), 2025-05-20
Supplement: MOESM1 [file 41467_2025_59682_MOESM1_ESM.pdf]

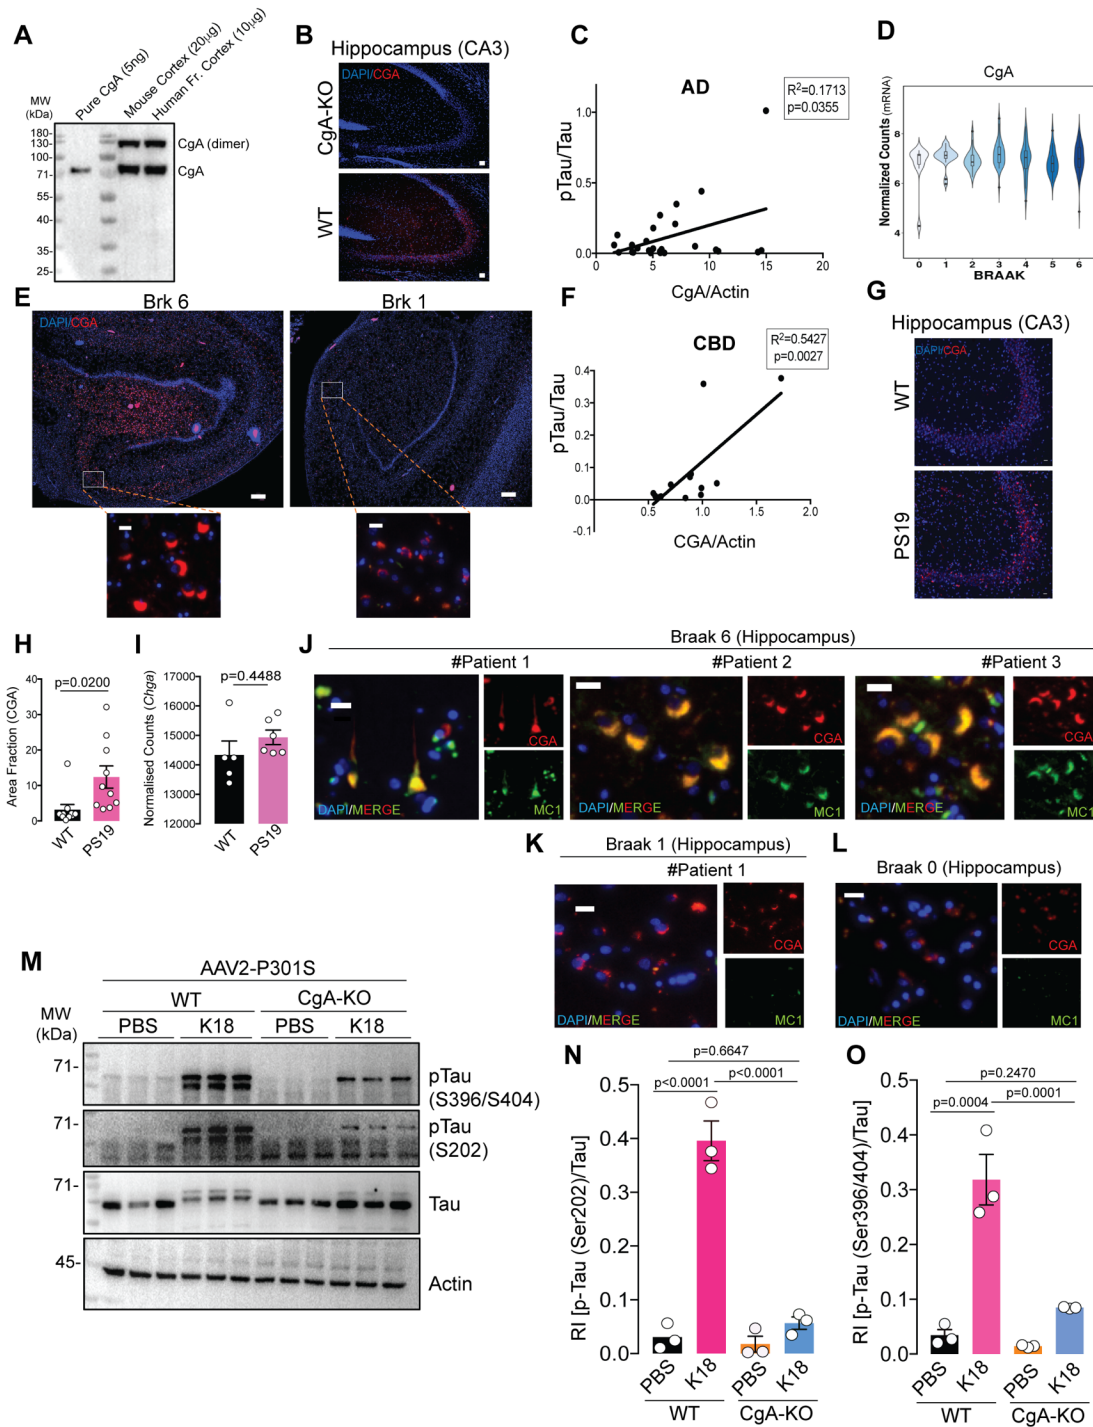

**Supplementary Fig 1. CgA co-localize with aggregated Tau (MC1) and CgA depletion in OTSC reduces Tau seeding.**

- Immunoblotting with pure CgA and lysate from mouse and human brain.
- IHC showing depletion of CgA in CgA-KO. Scale bar = 50 µm
- Pearson correlation of pTau/Tau and CgA/Actin in AD.

- D. Quantification of *CHGA* (gene encoding CgA) transcript levels of patient samples from all six Braak stages. The RNAseq data was obtained from publicly available AD-AMP dataset.
- E. Low Magnification image of Braak6 and Braak1 hippocampi with high magnification image of specified location inset. Scale bar = 400  $\mu\text{m}$
- F. Pearson correlation of pTau/Tau and CgA/Actin in CBD.
- G-H. Representative image of IHC of CgA in WT and PS19 mice hippocampus (G) with quantification (H). Scale bar = 20  $\mu\text{m}$ . P-value was calculated using Unpaired two-tailed T-test with Welch's correction,  $t = 2.658$ ,  $df = 12.75$ .
- I. Transcript level of CgA in WT ( $n=5$ ) and PS19 mice ( $n=6$ ) ( $t = 0.8106$ ,  $df = 5.947$ )
- J-K. Co-localization of CgA (red) and MC1 positive Tau filaments (green) in three different Braak 6 (J) and one Braak 1 (K) hippocampi. Scale bar = 20  $\mu\text{m}$ .
- L. Co-localization of CgA (red) and MC1 positive Tau (green) in Braak 0 hippocampi. Scale bar = 20  $\mu\text{m}$ .
- M. WB showing reduced pTau in AAV2-PS19 (P301S) transduced CgA-KO slices compared to WT.
- N-O. Densitometric quantification of phospho-Tau (Ser396/404, Ser202) between K18-treated and AAV2-hTau (P301S) transduced CgA-KO ( $n = 3$ ) and WT ( $n = 3$ ) slices. P-value was calculated using One-way Anova (I;  $F_{3,8} = 0.6742$ ,  $P = 0.5917$ , J;  $F_{3,8} = 1.547$ ,  $P = 0.2759$ ) Sidak's multiple comparison test. Data are presented as mean values  $\pm$  SEM. Source data are provided as a Source Data file.

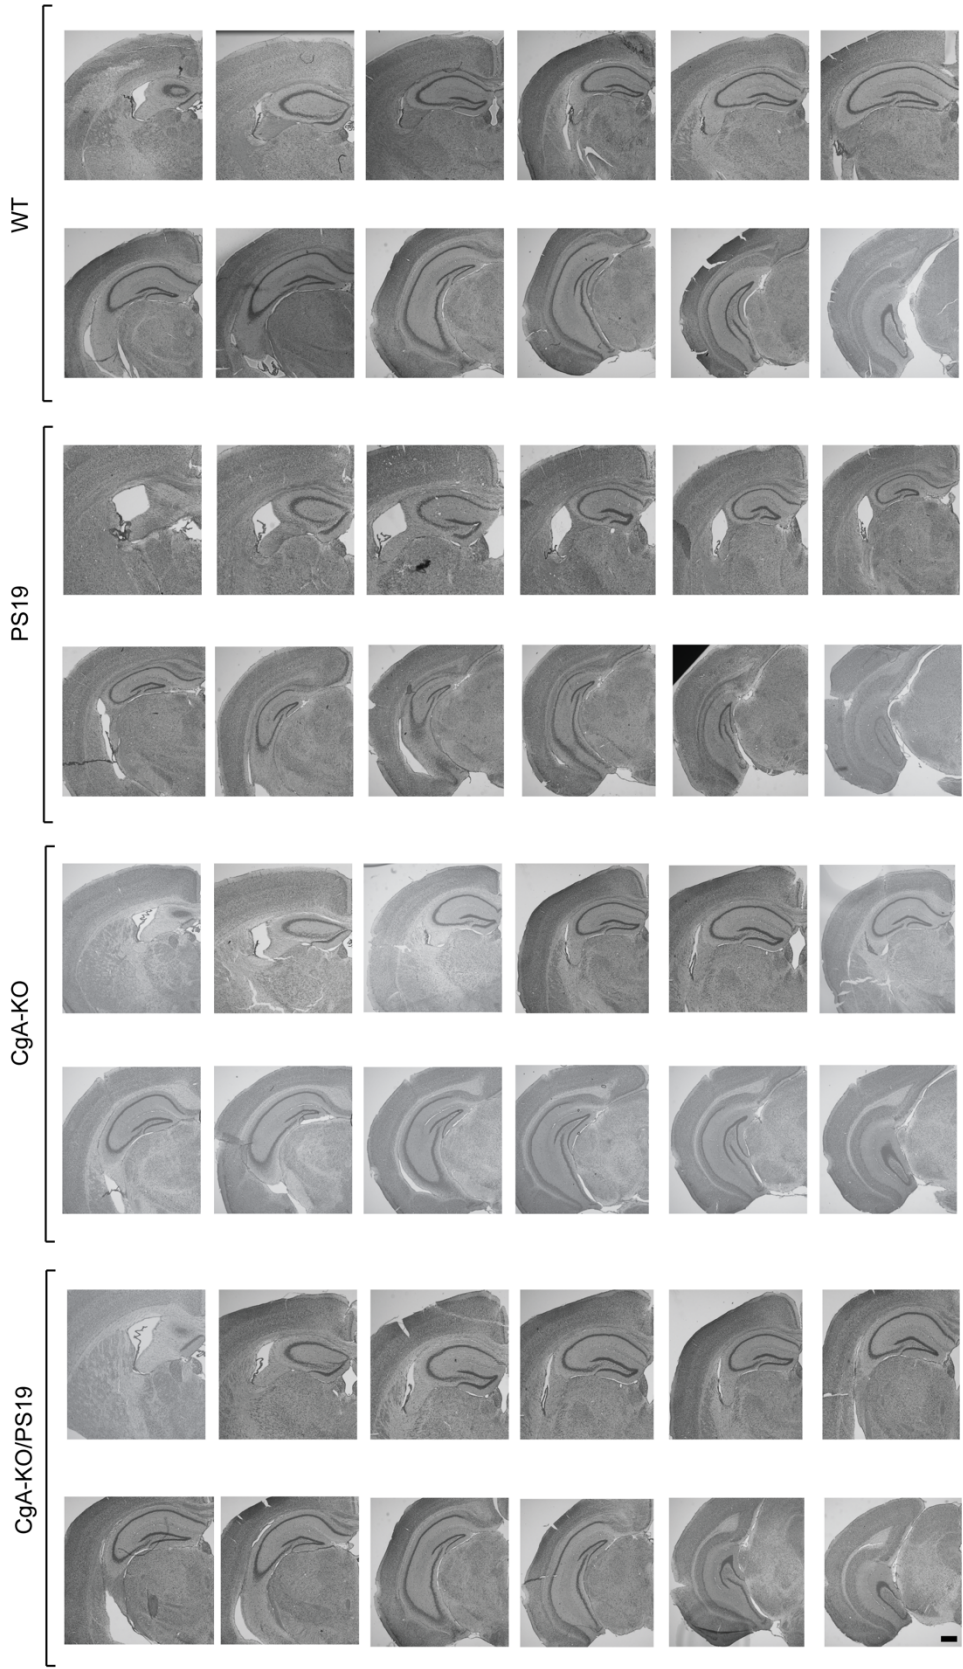

**Supplementary Fig 2. Series of hippocampus image for WT, PS19, CgA-KO and CgA-KO/PS19. Scale bar = 200  $\mu$ m.**



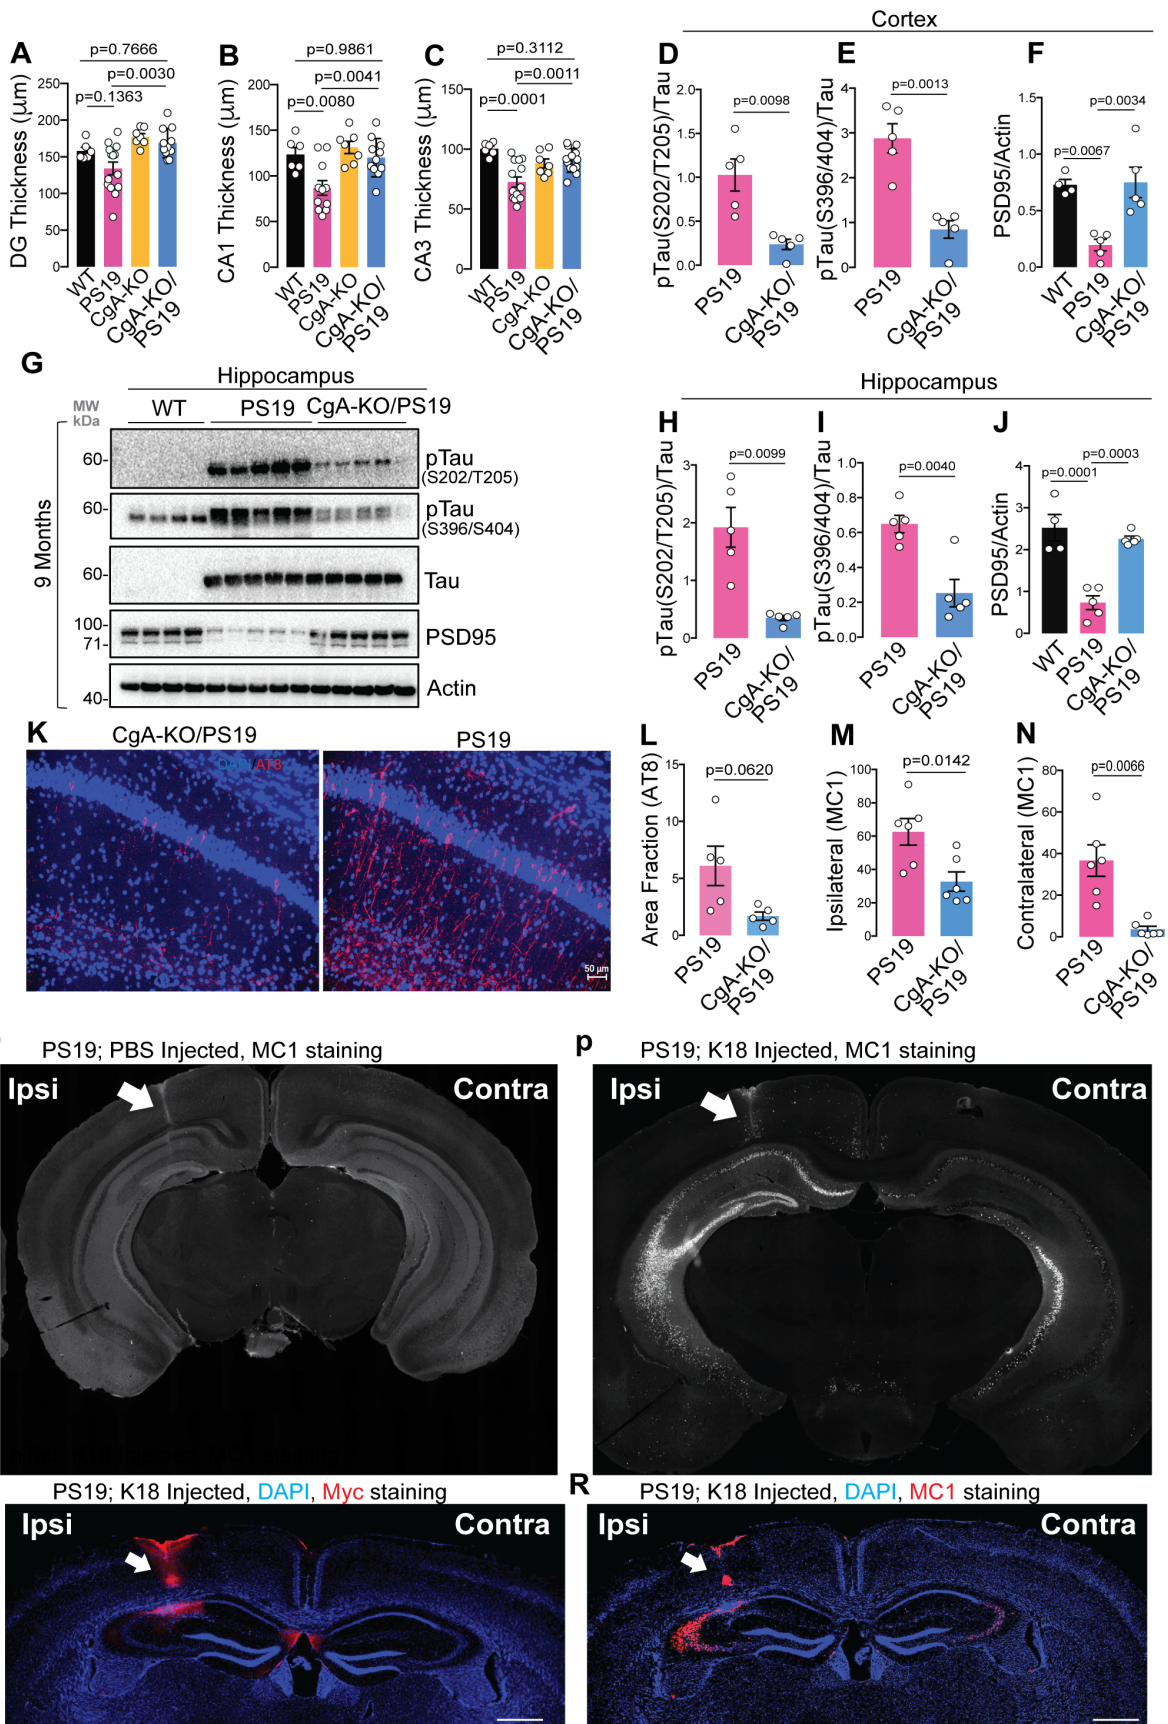

### Supplementary Fig 3. Rescue of tau pathology in CgA-KO/PS19 mice.

- A. Image J quantification of DG thickness in WT (n=6), PS19 (n = 14), CgA-KO/PS19 (n = 11) and CgA-KO mice (n = 7). P-values were calculated using One-way ANOVA ( $F_{3, 34} = 6.807$ ,  $p = 0.0010$ ) Sidak's Multiple Comparison test.
- B. Image J quantification of CA1 in WT (n = 6), PS19 (n = 11), CgA-KO/PS19 (n = 11), and CgA-KO (n = 7) mice. P-values were calculated using One-way ANOVA ( $F_{3, 31} = 7.521$ ,  $p = 0.0006$ ) Sidak's Multiple Comparison test.
- C. Image J quantification of CA3 thickness in WT (n=6), PS19 (n=14), CgA-KO/PS19 (n=13) and CgA-KO (n=7) mice. P-values were calculated using One-way ANOVA ( $F_{3, 36} = 9.392$ ,  $p = 0.0001$ ) Sidak's Multiple Comparison test.
- D-F. Densitometric quantification of WB of pTau (C & D) in CgA-KO/PS19 (n = 5) and PS19 (n = 5) mice, and PSD95 (E) in WT (n = 4), CgA-KO/PS19 (n = 5) and PS19 (n = 5) mice by image lab (n = 6). P-value for D and E was calculated using Unpaired two-tailed T-test with Welch's correction (D;  $t = 4.132$ ,  $df = 4.827$ , E;  $t = 5.348$ ,  $df = 6.545$ ). P-value for F was calculated using One-way Anova ( $F_{2, 11} = 11.84$ ,  $P = 0.0018$ ) Sidak's Multiple Comparison Test.
- G. WB of hippocampus RIPA lysates of WT (n = 4), PS19 (n = 5) and CgA-KO/PS19 (n = 5) mice showing levels of pathogenic phosphorylated Tau (pTau), total Tau, PSD95 and actin.
- H-J. Densitometric quantification of WB of pTau (C & D) in CgA-KO/PS19 (n = 5) and PS19 (n = 5) mice, and PSD95 (E) in WT (n = 4), CgA-KO/PS19 (n = 5) and PS19 (n = 5) mice by image lab (n = 6). P-value for D and E was calculated using Unpaired two-tailed T-test with Welch's correction (H;  $t = 4.523$ ,  $df = 4.126$ , I;  $t = 4.26$ ,  $df = 6.787$ ). P-value for J was calculated using One-way Anova ( $F_{2, 11} = 26.25$ ,  $P < 0.0001$ ) Sidak's Multiple Comparison Test.
- K-L. Representative IHC images of p-Tau (Ser 202/Thr205) with quantification in CgA-KO/PS19 and PS19 mice (n = 5). In G, p-value was calculated using unpaired two-tailed T-test with Welch's correction,  $t = 2.498$ ,  $df = 4.346$ .
- M-N. Quantification of MC1+ Tau seeds in ipsilateral (H) and contralateral (I) side of the brain. P-values were calculated using unpaired two-tailed T-test with Welch's correction (H;  $t = 3.024$ ,  $df = 9.095$ , I;  $t = 4.287$ ,  $df = 5.395$ ).
- O. PBS injected PS19 showing no MC1 staining. White arrow marks the area of injection.
- P. K18 injected PS19 showing MC1 staining. White arrow marks the area of injection.
- Q. MyC staining showing K18 (Myc tagged) injection in the ipsilateral hippocampus and K18 is not spread to the contralateral hippocampus. White arrow marks the area of injection.
- R. MC1 staining shows the spreading of Tau from ipsilateral to contralateral hippocampus of the same brain used in Q. White arrow marks the area of injection. Scale bar = 200  $\mu\text{m}$ . Data are presented as mean values  $\pm$  SEM. Source data are provided as a Source Data file.

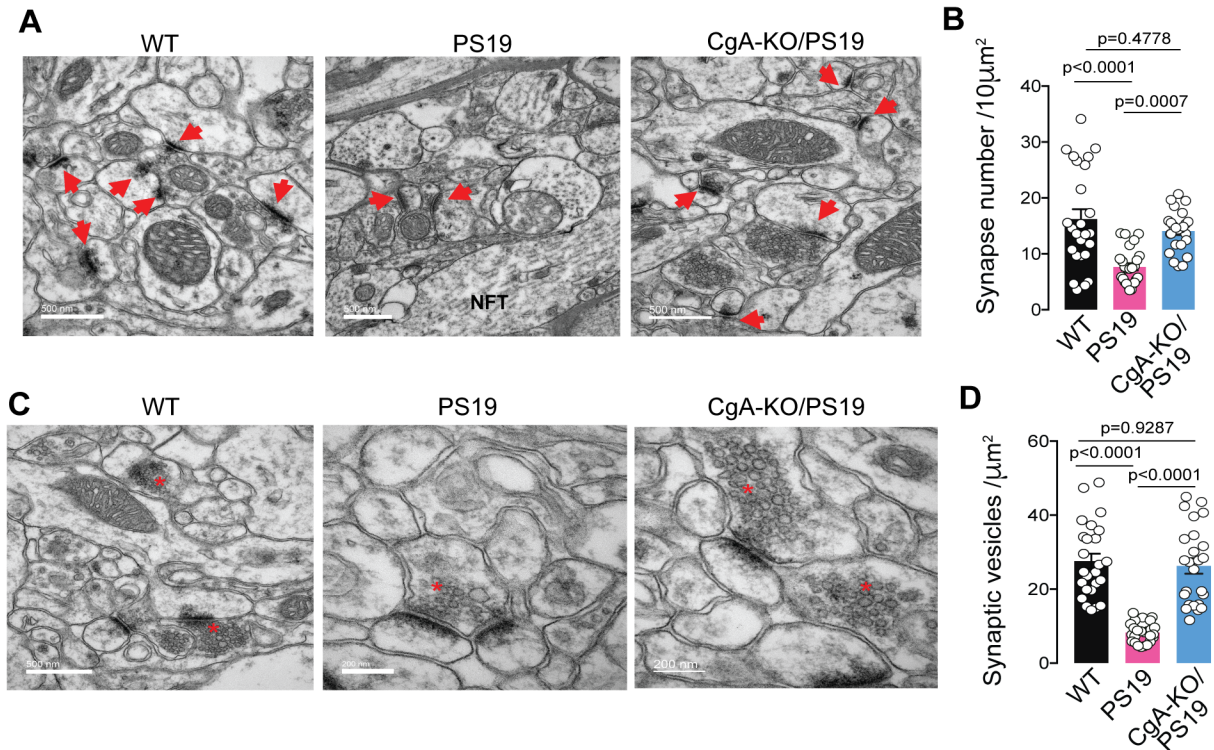

**Supplementary Fig 4. Ultrastructure analysis of WT, PS19 and CgA-KO/PS19 brain.**

A-B. Transmission electron microscopy (TEM) image showing synapse density in CgA-KO/PS19 (n=25; 25 micrographs from 3 animals), PS19 (n=25; 25 micrographs from 3 animals) and WT (n=25; 25 micrographs from 3 animals) mice, quantified in P as a function of synapse number measured in 10 $\mu\text{m}^2$ . P-value in B was calculated using One-way ANOVA ( $F_{2, 72} = 10.74$ ,  $P < 0.0001$ ) Tukey's Multiple Comparison test.

C-D. TEM images showing synaptic vesicles in CgA-KO/PS19 (n=25; 25 micrographs from 3 animals), PS19 (n=25; 25 micrographs from 3 animals) and WT (n=25; 25 micrographs from 3 animals) mice depicted by TEM images and quantification (D). P-values in D were calculated using One-way ANOVA ( $F_{2, 72} = 13.95$ ,  $P < 0.0001$ ) Tukey's Multiple Comparison test. Data are presented as mean values  $\pm$  SEM. Source data are provided as a Source Data file.

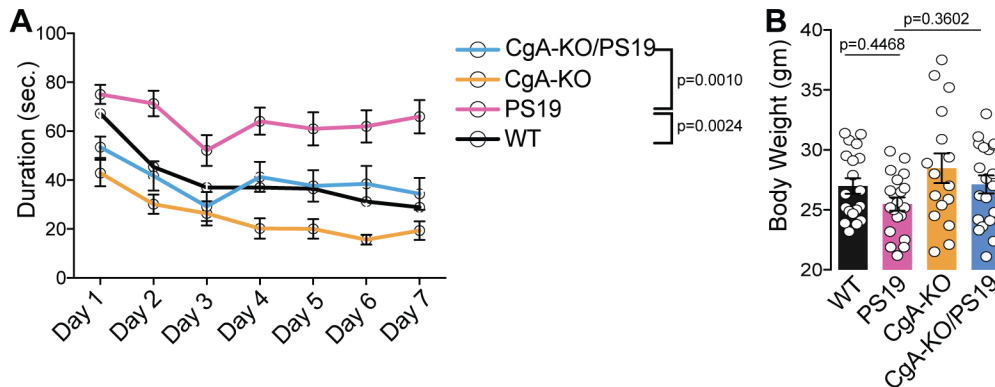

**Supplementary Fig 5. Improved cognitive and motor function in CgA-KO/PS19 mice compared to PS19 mice.**

- A. Time taken to reach the platform in each day of MWM by all four mice group [WT (n = 18), CgA-KO (n = 16), PS19 (n = 19) and CgA-KO/PS19 (n = 20)]. P-value was calculated using Two-way ANOVA ( $F_{18, 414} = 1.921$ ,  $P = 0.0132$ ) Turkey's Multiple comparison test.
- B. Body weight for all four mice groups (WT, CgA-KO, PS19 and CgA-KO/PS19). [WT (n = 19), CgA-KO (n = 20), PS19 (n = 16) and CgA-KO/PS19 (n = 20)]. p-value was calculated using One-way ANOVA ( $F_{3, 71} = 2.255$ ,  $P=0.0894$ ) Sidak's Multiple comparison test. Data are presented as mean values +/- SEM. Source data are provided as a Source Data file.



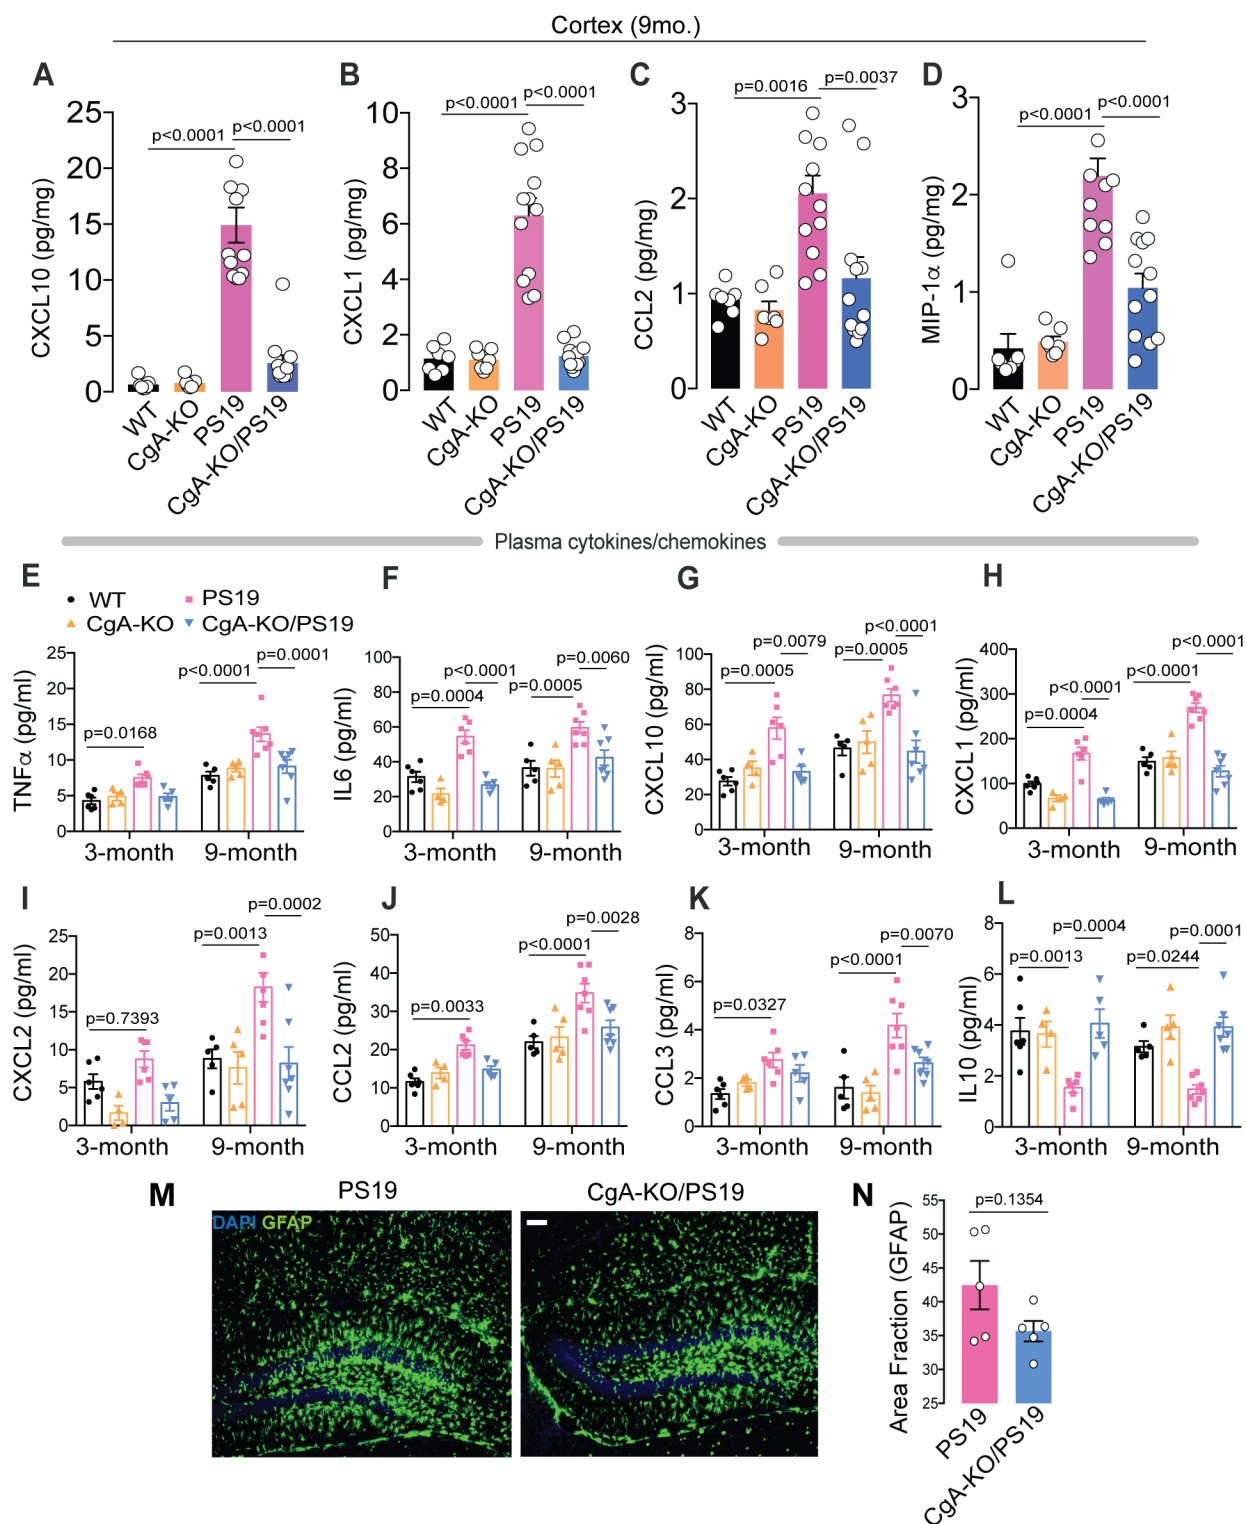

Supplementary Fig 6. CgA-KO/PS19 mice exhibit decreased microglial markers compared to PS19 mice



- A-D. Inflammatory cytokine levels in the cortex of WT (n = 7), PS19 (n = 12), CgA-KO (n = 7) and CgA-KO/PS19 (n = 12) mice at 9 months of age (mo). P-values were calculated using One-way ANOVA Turkey's Multiple Comparison Test. A: CXCL10;  $F_{3, 34} = 42.98$ ,  $P < 0.0001$ , B: CXCL1;  $F_{3, 34} = 43.82$ ,  $P < 0.0001$ , C: CCL2;  $F_{3, 34} = 9.272$ ,  $P = 0.0001$ , D: CCL3;  $F_{3, 34} = 27.79$ ,  $P < 0.0001$ .
- E-L. Plasma inflammatory cytokine levels at 3 mo and 9 mo age in WT, PS19, CgA-KO and CgA-KO/PS19 mice. [3 mo; WT (n = 6), CgA-KO (n = 5), PS19 (n = 6), CgA-KO/PS19 (n = 5) and 9 mo; WT (n = 5), CgA-KO (n = 5), PS19 (n = 7), CgA-KO/PS19 (n = 7)]. P-values were calculated using Two-way ANOVA Sidak's multiple comparison test. E:  $\text{TNF}\alpha$ ;  $F_{3, 37} = 1.317$ ,  $P = 0.2836$ , F: IL6;  $F_{3, 37} = 1.171$ ,  $P = 0.3338$ , G: CXCL10;  $F_{3, 37} = 0.2628$ ,  $P = 0.8517$ , H: CXCL1;  $F_{3, 37} = 2.406$ ,  $P = 0.0828$ , I: CXCL2;  $F_{3, 37} = 1.426$ ,  $P = 0.2507$ , J: CCL2;  $F_{3, 37} = 0.4855$ ,  $P = 0.6944$ , K: CCL3;  $F_{3, 37} = 0.4855$ ,  $P = 0.6944$ , L: IL10;  $F_{3, 37} = 0.3789$ ,  $P = 0.7688$ .
- M. Representative IF images showing the levels of GFAP in the hippocampi (CA1 region) of PS19 and CgA-KO/PS19 mice. Scale bar = 50  $\mu\text{m}$ .
- N. Quantification of GFAP fraction area calculated from IF mages as shown in G (n = 5 per group). P-value was calculated using Unpaired two-tailed T-test with Welch's correction,  $t = 1.754$ ,  $df = 5.399$ . Data are presented as mean values  $\pm$  SEM. Source data are provided as a Source Data file.

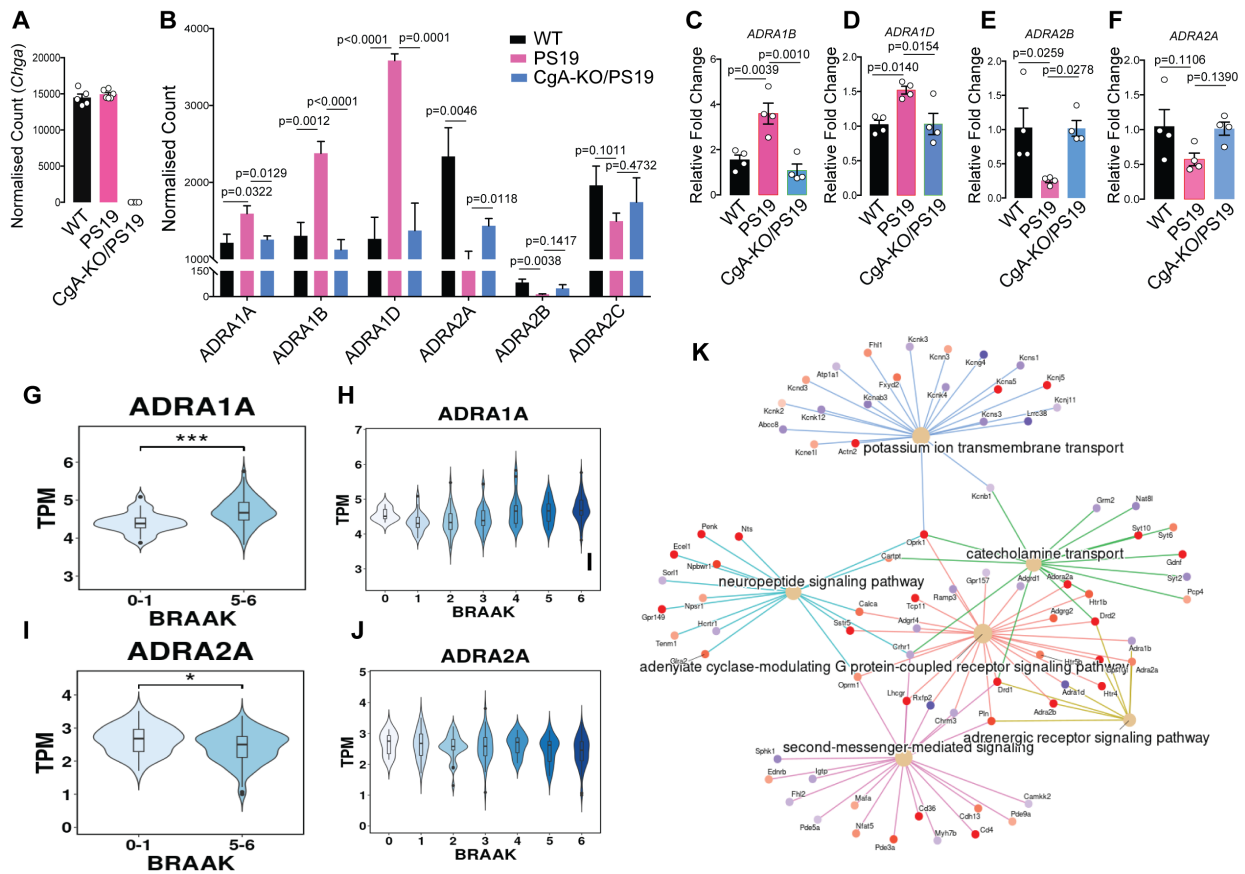

**Supplementary Fig. 7. Validation of transcriptional changes of genes identified in RNA-seq of WT, PS19 and CgA-KO/PS19 hippocampus.**

- Normalized count of *Chga* mRNA in WT, PS19 and CgA-KO/PS19.
- Normalized counts of class I and class II alpha-adrenergic receptors in WT, PS19 and CgA-KO/PS19 hippocampus. P-values were calculated using Two-way ANOVA Dunnett's multiple comparison test ( $F_{10, 84} = 13.88$ ,  $P < 0.0001$ )
- F. qPCR of genes in WT, PS19 and CgA-KO/PS19. P-values were calculated using One-way ANOVA (C;  $F_{2, 9} = 15.85$ ,  $P = 0.0011$ , D;  $F_{2, 9} = 7.907$ ,  $P = 0.0104$ , E;  $F_{2, 9} = 2.787$ ,  $P = 0.1143$ , F;  $F_{2, 9} = 6.255$ ,  $P = 0.0198$ ) Sidak's multiple comparison test.
- J. Analysis of alpha-1 adrenergic receptor transcript level in Braak stage 1 and Braak stage 6 patients (parahippocampal gyrus) from AMP-AD database.
- Network analysis of the pathway involved depicting adrenergic signaling pathway as an important one linked with catecholamine transport, neuropeptide signaling and potassium ion transmembrane transport. Data are presented as mean values  $\pm$  SEM. Source data are provided as a Source Data file.

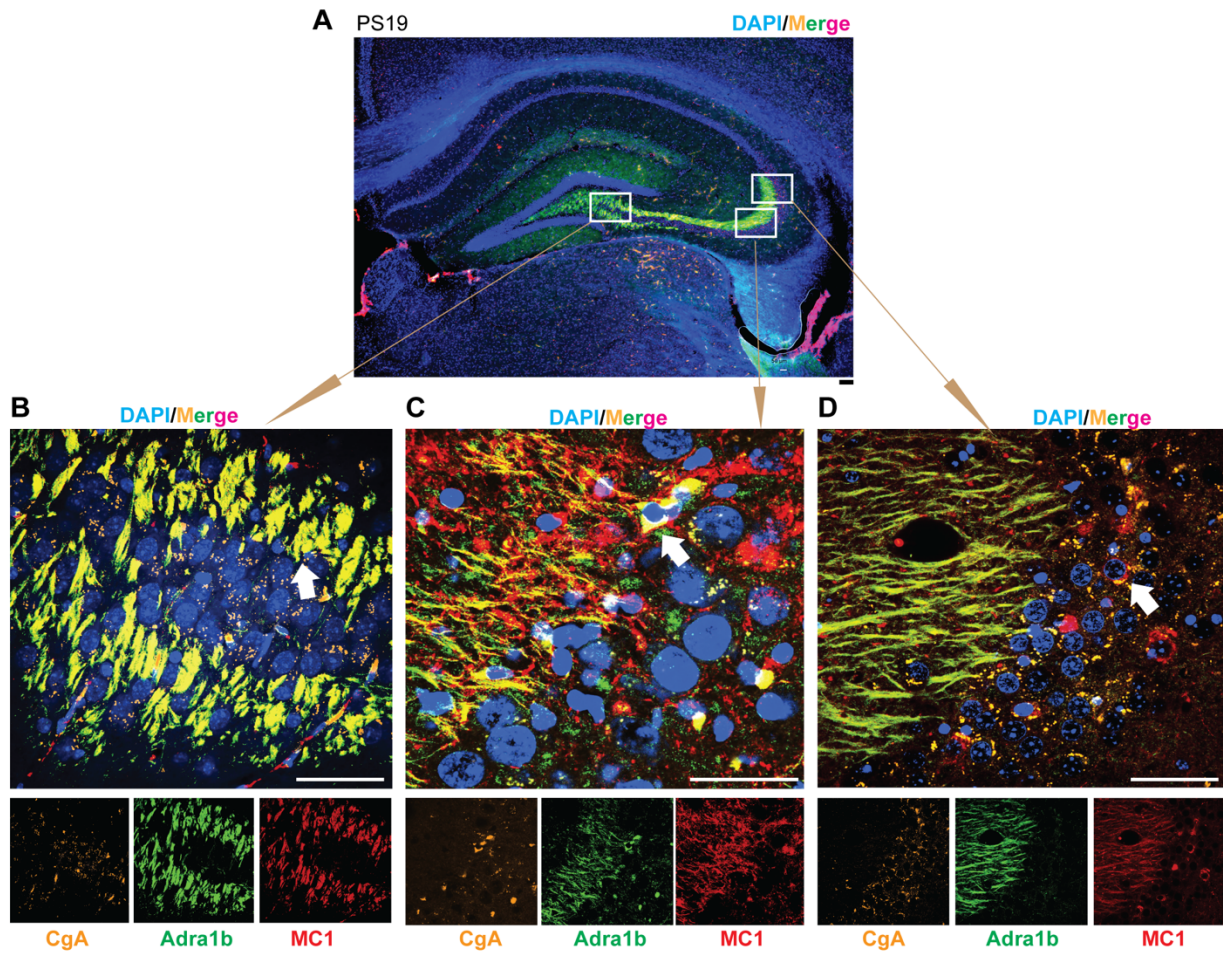

**Supplementary Fig 8. Immunohistochemistry of CgA, Adra1b and Tau filaments in PS19 hippocampus.**

- A. Low magnification image of the PS19 hippocampus. Scale bar = 100  $\mu\text{m}$ .
- B. High magnification image of the CA4 region of the hippocampus. The region of hippocampus is shown by box in A. Scale bar = 50  $\mu\text{m}$ .
- C-D. High magnification image of CA3 region of hippocampus for CgA, Adra1b and Tau filaments. Region of hippocampus selected is encircled by white box in A. Scale bar = 50  $\mu\text{m}$ .

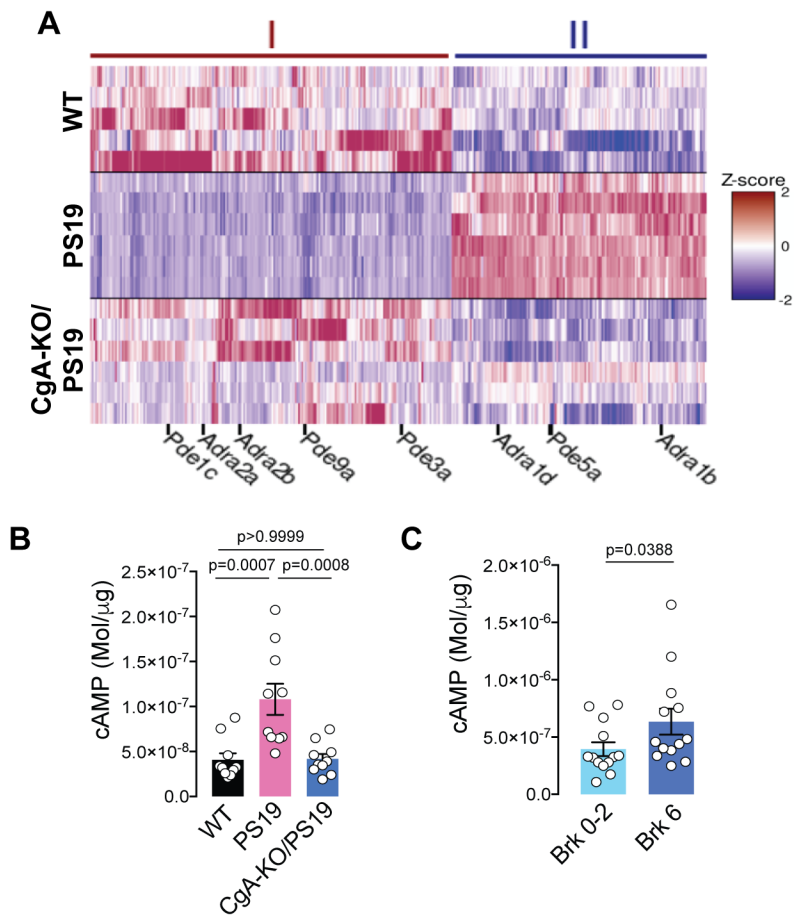

**Supplementary Fig. 9. Enhanced cAMP and Phosphodiesterase (PDE) level in CgA-KO/PS19 mice.**

- RNA-seq analysis of differentially expressed genes (DEGs) showing the expression of different phosphodiesterases (PDEs) across the three genotypes (WT, PS19 and CgA-KO/PS19).
- Decreased cAMP level in the cortex of CgA-KO/PS19 mice compared to PS19 mice.  $N = 10$ . P-values were calculated using One-way ANOVA ( $F_{2, 27} = 11.75$ ,  $P = 0.0002$ ) Sidak's Multiple comparison test.
- Increased cAMP level in Braak stage 6 patient ( $n=13$ ) cortex lysates compared to Braak stage 1-2 ( $n=13$ ). P-value is calculated using Unpaired Two-tailed T-test,  $t = 1.8666$ ,  $df = 24$ . Data are presented as mean values  $\pm$  SEM. Source data are provided as a Source Data file.

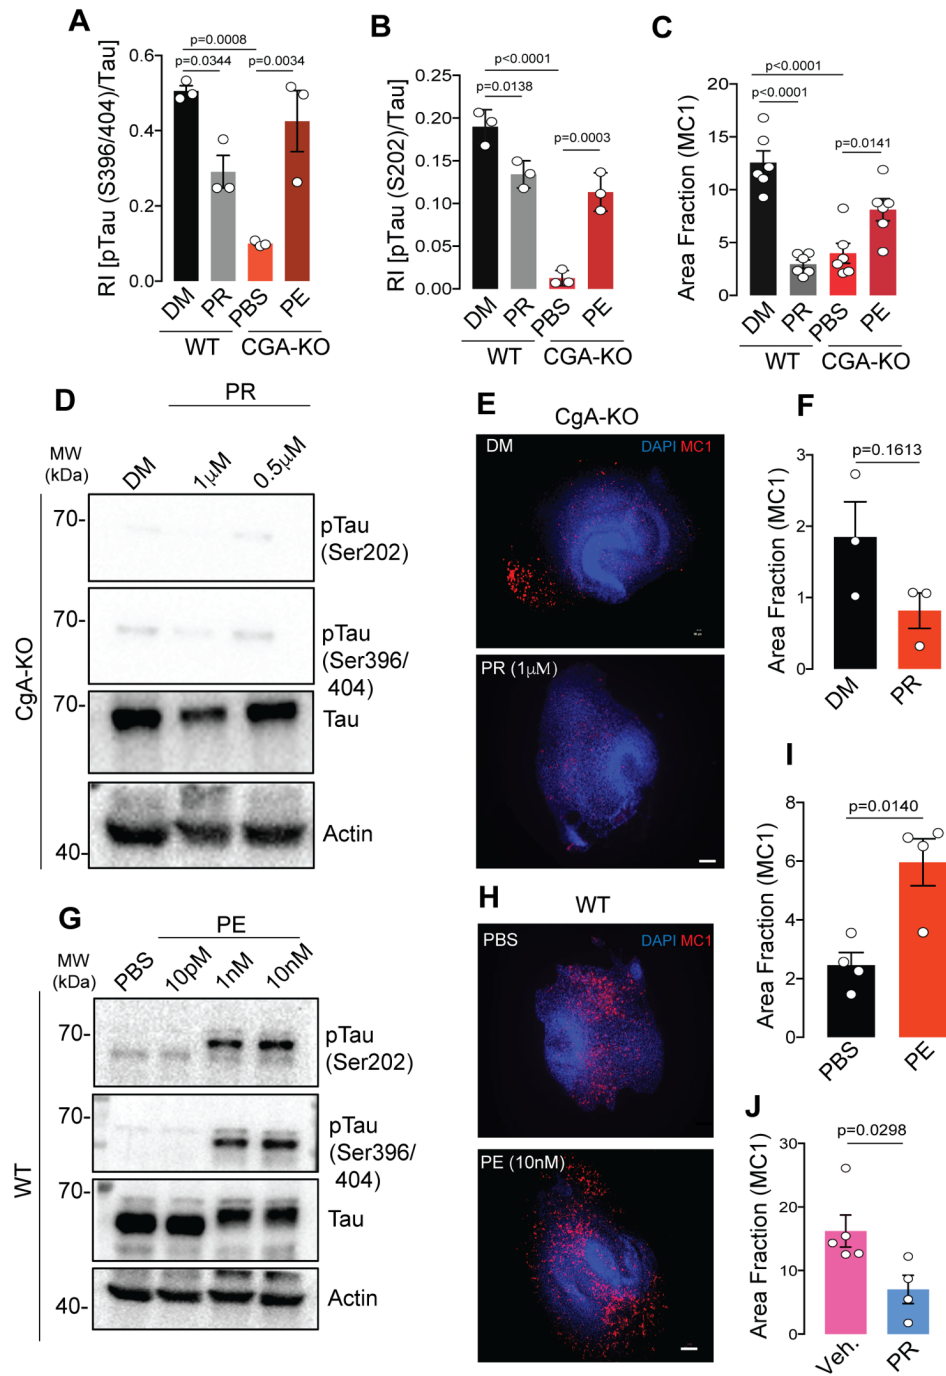

**Supplementary Fig 10. Alpha-1 Adrenergic receptor regulates Tau phosphorylation and formation of neurofibrillary tangles.**



- A. WB quantification of Tau phosphorylation at S396/S404 relative to total tau levels (n=3). P-value was calculated using One-way Anova ( $F_{3, 8} = 0.6682$ ,  $P = 0.0013$ ) Sidak's multiple comparison test.
- B. WB quantification of Tau phosphorylation at S202 relative to total tau levels (n=3). P-value was calculated using One-way Anova ( $F_{3, 8} = 0.3892$ ,  $P < 0.0001$ ) Sidak's multiple comparison test.
- C. Image J quantification of MC1+ misfolded Tau species in OTSC as percentage of total slice area from IF images as shown in E. (n = 6 per group). P-value was calculated using One-way Anova ( $F_{3, 20} = 0.5465$ ,  $P < 0.0001$ ) Sidak's multiple comparison test.
- D. Western blot showing pTau in Prazosin (PR) treated CgA-KO OTSC.
- E. Representative IHC image of DMSO (DM) and PR treated CgA-KO OTSC. Scale bar = 200  $\mu\text{m}$ .
- F. Image J quantification of the image in E ( $t = 1.861$   $df = 2.948$ ).
- G. Western blot showing pTau in Phenylephrine (PE) treated WT OTSC
- H. Representative IHC image of PBS and PE treated WT OTSC.
- I. Image J quantification of the image in G ( $t = 3.849$ ,  $df = 4.619$ )
- J. ImageJ quantification of MC1 staining in veh. (n = 5) And PR (n = 4) treated PS19 mice. P-value was calculated using unpaired two-tailed T-test with Welch's correction ( $t = 2.72$ ,  $df = 6.998$ ). Data are presented as mean values +/- SEM. Source data are provided as a Source Data file.

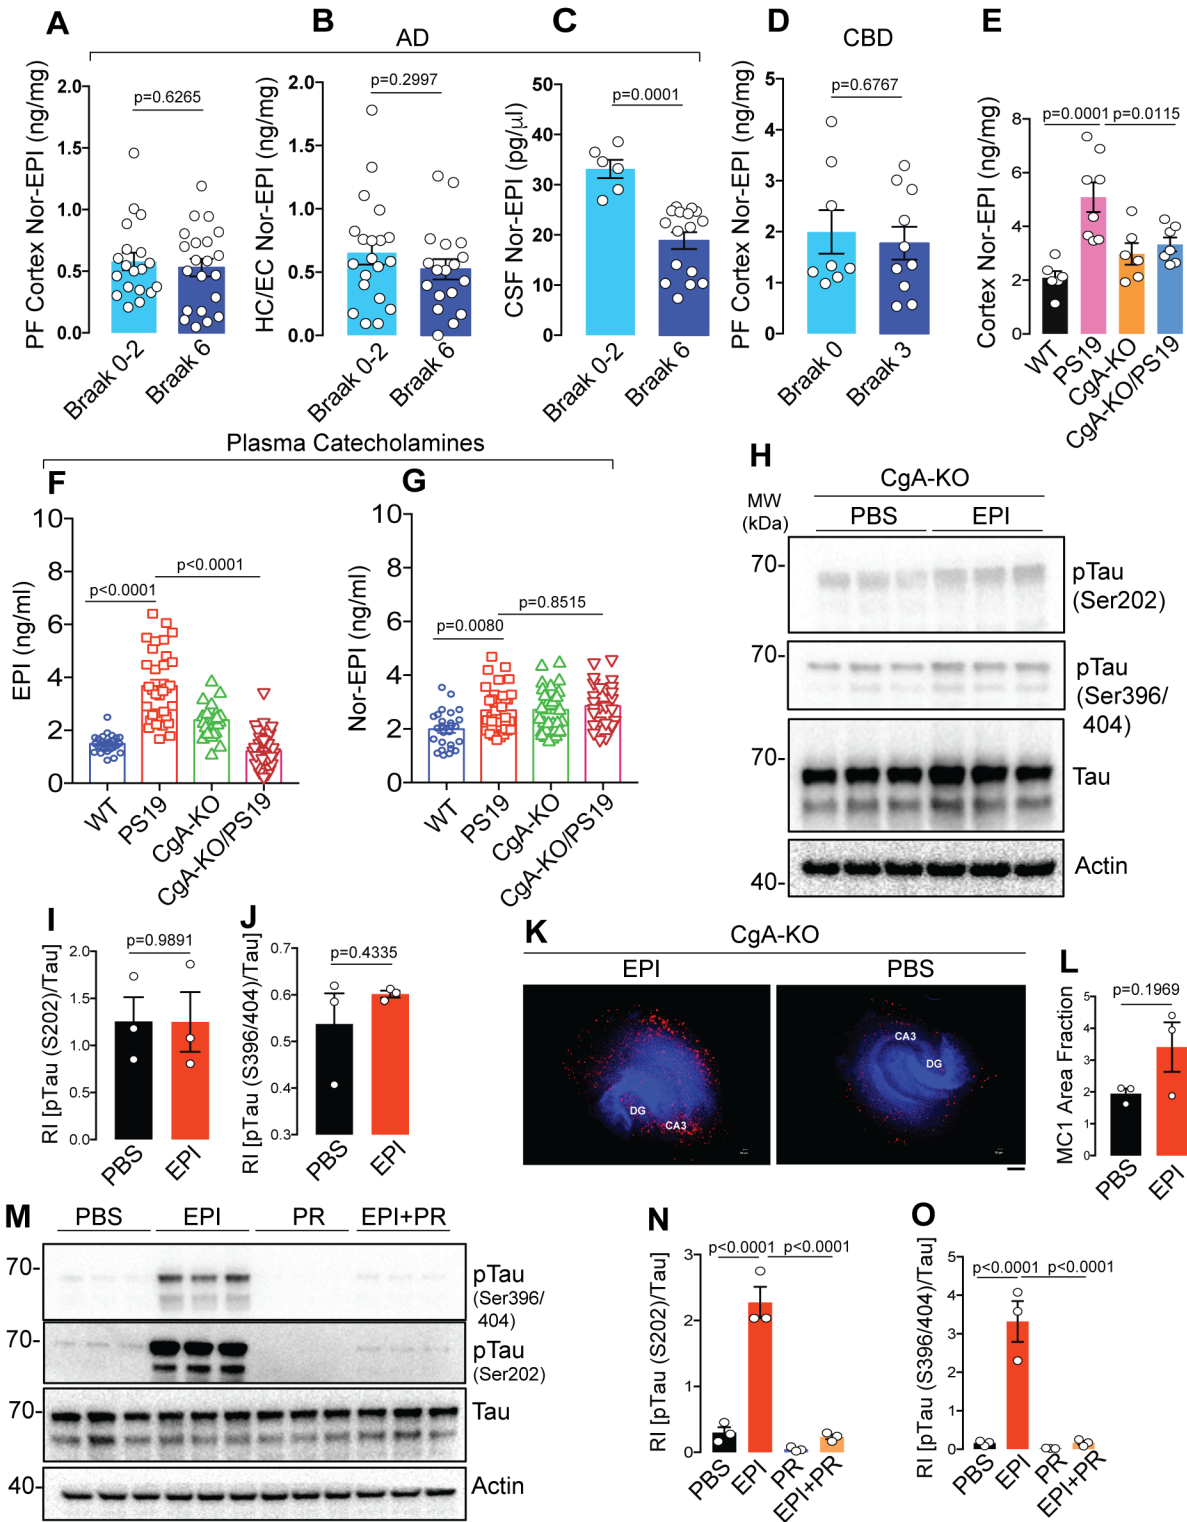

**Supplementary Fig 11. Catecholamine levels in AD and CBD patient cortex and in CgA-KO/PS19 mice plasma.**

- A-C. Norepinephrine (NE) levels in Braak 6 and Braak 0-2 AD prefrontal cortex (A), hippocampus/entorhinal cortex (B) and CSF (C). cortex [Braak 0-2 (n = 19), Braak 6 (n = 21)], hippocampus [Braak 0-2 (n = 18), Braak 6 (n = 20)]. P-values were calculated using unpaired two-tailed T-test. (A;  $t = 4.907$ ,  $df = 38$ , B;  $t = 1.052$ ,  $df = 36$ , C;  $t = 4.812$ ,  $df = 20$ )
- D. NE levels in CBD pre-frontal cortex. Braak 0 (n = 8), Braak 3 (n = 10). P-values were calculated using unpaired two-tailed T-test,  $t = 0.4247$ ,  $df = 16$ .
- E. NE levels in cortex of WT (n = 6), PS19 (n = 7), CgA-KO (n = 6) and CgA-KO/PS19 (n = 7) mice. P-values were calculated using One-way ANOVA, ( $F_{3, 23} = 9.88$ ,  $P = 0.0002$ ) Dunnett's multiple comparison test.
- F. EPI level in plasma of WT (n = 26), PS19 (n = 33), CgA-KO (n = 26) and CgA-KO/PS19 (n = 32) mice. P-values were calculated using One-way ANOVA ( $F_{3, 108} = 12.08$ ,  $P < 0.0001$ ) Sidak's multiple comparison test.
- G. NE levels in plasma of WT (n = 26), PS19 (n = 33), CgA-KO (n = 26) and CgA-KO/PS19 (n = 32) mice. P-values were calculated using One-way ANOVA ( $F_{3, 109} = 4.348$ ,  $P = 0.0062$ ) Sidak's multiple comparison test.
- H. Western blot of pTau in PBS and Epinephrine (EPI) treated CgA-KO OTSC.
- I-J. Densitometric quantification of pTau in PBS (n = 3) and EPI (n = 3) treated CgA-KO slice (I;  $t = 0.01463$ ,  $df = 3.843$ . J;  $t = 0.9668$ ,  $df = 2.05$ )
- K. Representative IHC image of MC1 staining in PBS and EPI treated CgA-KO OTSC. Scale bar = 200  $\mu\text{m}$ .
- L. ImageJ quantification of MC1 area fraction in PBS (n = 3) and EPI (n = 3) treated CgA-KO OTSC ( $t = 1.839$ ,  $df = 2.175$ ).
- M. Western blot showing pTau in PBS, Epinephrine (EPI), Prazosin (PR) and EPI+PR treated WT OTSC.
- N-O. Densitometric quantification of pTau in PBS (n = 3), EPI (n = 3), PR (n = 3) and EPI+PR (n = 3). P-value was calculated using One-way Anova (N;  $F_{3, 8} = 66.65$ ,  $P < 0.0001$ , O;  $F_{3, 8} = 36.26$ ,  $P < 0.0001$ ) Sidak's Multiple Comparison Test. Data are presented as mean values  $\pm$  SEM. Source data are provided as a Source Data file.

**Supplementary Table 1:  
Alzheimer's Disease Patient sample details:**

| PATHID                                | REGTRYID | CSFID   | PATHDX1                              | BRAAK1 | SEX |
|---------------------------------------|----------|---------|--------------------------------------|--------|-----|
| 5919                                  | 3454     | 12/064  | Normal                               | 1      | F   |
| 5909                                  | 3194     | 5909    | Primary Age-Related Tauopathy (PART) | 2      | M   |
| 5903                                  | 8176     | 8176-12 | Primary Age-Related Tauopathy (PART) | 2      | M   |
| 5864                                  | 8011     | 5864    | Primary Age-Related Tauopathy (PART) | 2      | M   |
| 5844                                  | 2115     | 5844    | Normal                               | 2      | F   |
| 5687                                  | 3396     | 12/032  | Normal                               | 1      | M   |
| 5856                                  | 3354     |         | Alzheimer's changes                  | 2      | M   |
| 5747                                  | 3046     |         | Alzheimer's changes                  | 2      | M   |
| 5699                                  | 14043    |         | Alzheimer's changes                  | 2      | F   |
| 5662                                  | 14005    |         | Alzheimer's changes                  | 2      | F   |
| 5655                                  | 2785     |         | Alzheimer's changes                  | 2      | F   |
| 5601                                  | 8132     |         | Alzheimer's changes                  | 2      | M   |
| 5510                                  | 2621     |         | Alzheimer's changes                  | 1      | M   |
| 5495                                  | 2853     |         | Alzheimer's changes                  | 2      | M   |
| 5447                                  | 14080    |         | Alzheimer's changes                  | 1      | F   |
| 5434                                  | 2894     |         | Alzheimer's changes                  | 2      | M   |
| 5398                                  | 14083    |         | Alzheimer's changes                  | 0      | F   |
| 5381                                  | 2963     |         | Alzheimer's changes                  | 2      | M   |
| 5372                                  |          |         | Normal                               | 1      | F   |
| 5356                                  | 2861     |         | Alzheimer's changes                  | 1      | F   |
| <b>Chen 22-25 CSF + fHip/EC + fFC</b> |          |         |                                      |        |     |
| PATHID                                | REGTRYID | CSFID   | PATHDX1                              | BRAAK1 | SEX |
| 5945                                  | 3448     | 15/031  | Alzheimer's disease                  | 6      | M   |
| 5937                                  | 3183     | 5937    | Alzheimer's disease                  | 6      | F   |
| 5933                                  | 8052     | 5933    | Alzheimer's disease                  | 6      | F   |
| 5930                                  | 3070     | 5930    | Alzheimer's disease                  | 6      | F   |
| 5928                                  | 3265     | 13/010  | Alzheimer's disease                  | 6      | F   |
| 5921                                  | 3435     | 13/057  | Alzheimer's disease                  | 6      | F   |
| 5912                                  | 3188     | 13/002  | Alzheimer's disease                  | 6      | F   |
| 5906                                  | 3532     | 11/014  | Alzheimer's disease                  | 6      | F   |
| 5899                                  | 3682     | 5899    | Alzheimer's disease                  | 6      | F   |
| 5892                                  | 3449     | 5892    | Alzheimer's disease                  | 6      | F   |
| 5889                                  | 3213     | 5889    | Alzheimer's disease                  | 6      | F   |
| 5885                                  | 3845     | 12/013  | Alzheimer's disease                  | 6      | F   |
| 5838                                  | 3065     | 5838    | Alzheimer's disease                  | 6      | M   |
| 5834                                  |          | 15/027  | Alzheimer's disease                  | 6      | F   |
| 5832                                  | 3569     | 13/024  | Alzheimer's disease                  | 6      | M   |

|      |       |        |                     |   |   |
|------|-------|--------|---------------------|---|---|
| 5830 | 3523  | 15/004 | Alzheimer's disease | 6 | F |
| 5931 | 3088  |        | Alzheimer's disease | 6 | F |
| 5918 | 8233  |        | Alzheimer's disease | 6 | F |
| 5914 | 19008 |        | Alzheimer's disease | 6 | M |
| 5905 |       |        | Alzheimer's disease | 6 | M |



**Supplementary Table 2:  
Corticobasal Degeneration (CBD) patient sample details:**

| ID      | Disease                                                              | Braak stage | Clinical ID             | Family history | SEX |
|---------|----------------------------------------------------------------------|-------------|-------------------------|----------------|-----|
| bb20009 | CBD/PART/AGD/ARTAG/SRT                                               | 3           | CBD                     | Yes            | M   |
| bb20061 | CBD/AGD/ARTAG/PART                                                   | 3           | CBD                     | No             | M   |
| bb20082 | CBD/AGD/ARTAG/PART                                                   | 3           | FTD                     | No             | M   |
| bb20171 | CBD/AGD/TSA (ARTAG)/SC/Binswanger                                    | 3           | FTD                     | Yes            | F   |
| bb20225 | CBD/SC/ARTAG                                                         | 3           | CBD                     | No             | M   |
| bb20299 | CBD/PSD(PNLA)/AGD/ARTAG/SC                                           | 3           | CBD                     | No             | M   |
| bb20335 | CBD/AGD/ARTAG/PART                                                   | 3           | CBD                     | No             | F   |
| bb21098 | CBD/PART/ARTAG                                                       | 3           | FTD                     | No             | F   |
| bb21201 | CBD (CBD-Cog)/CAA/PART                                               | 3           | CBD                     | No             | M   |
| bb20005 | PSP/ARTAG                                                            | 0           | PSP                     | No             | M   |
| bb20311 | PSP (pure)                                                           | 0           | PSP                     | No             | M   |
| bb20380 | PSP (cbl ctx & dentate)/SC                                           | 0           | CBD                     | Yes            | F   |
| bb21419 | CBD (PNLA)/SC/AGD/ARTAG                                              | 0           | CBD                     | No             | F   |
| bb21004 | Normal (pseudo-dementia)                                             | 0           | CBD                     | No             | M   |
| bb21204 | Normal (pseudo-dementia, drug-related parkinsonism)/AGD (mild)/ARTAG | 0           | depression (ECT/VNS)/PD | No             | M   |
| bb21537 | Normal                                                               | 0           | All                     | No             | F   |
| bb23173 | Normal (GAD)                                                         | 0           | Anxiety Disorder        | No             | M   |
| bb22281 | PART/brainstem encephalitis/depressive pseudodementia                | 0           | FTD                     | No             | F   |

**Supplementary Table 3: qPCR Forward and Reverse Primer sequence details:**

| <b>Gene name</b>      | <b>Forward</b>                   | <b>Reverse</b>                   |
|-----------------------|----------------------------------|----------------------------------|
| <b><i>ADRA1B</i></b>  | 5' GAAAGCAGCCAAAACCTTGGGC<br>3'  | 5' CACTACCTTGAATACGGCGTCC 3'     |
| <b><i>ADRA1D</i></b>  | 5' GTGTCTTCGTCCTGTGCTGGTT 3'     | 5' GCCAGAAGATGACCTTGAAGACG<br>3' |
| <b><i>ADRA2A</i></b>  | 5' CAGGTGACACTGACGCTGGTTT<br>3'  | 5' GACACCAGGAAGAGGTTTTGGG<br>3'  |
| <b><i>ADRA2B</i></b>  | 5' GTGTGCCATCAGTCTGGACAGA<br>3'  | 5' CAATGAGCCACACGGTGAGGAT<br>3'  |
| <b><i>β-ACTIN</i></b> | 5' CATTGCTGACAGGATGCAGAAGG<br>3' | 5' TGCTGGAAGGTGGACAGTGAGG<br>3'  |

**Supplementary Table 4: Summary of the RNA-Seq data derived from AMP-AD (Accelerating Medicines Partnership-Alzheimer’s Disease) project. There are seven cohorts in the dataset for parahippocampal gyrus.**

| Study                  | Brain Region                 | Cohort    | Braak Stage |    |    |    |    |    |    |       |    | # Control (BRAAK 0-1) | #AD (BRAAK 5-6) | # Filtered Genes |
|------------------------|------------------------------|-----------|-------------|----|----|----|----|----|----|-------|----|-----------------------|-----------------|------------------|
|                        |                              |           | 0           | 1  | 2  | 3  | 4  | 5  | 6  | Total |    |                       |                 |                  |
| Mount Sinai Brain Bank | Parahippocampal gyrus (BM36) | MSBB_BM36 | 0           | 1  | 2  | 3  | 4  | 5  | 6  | Total | 34 | 89                    | 23201           |                  |
|                        |                              |           | 10          | 24 | 35 | 40 | 23 | 24 | 65 | 221   |    |                       |                 |                  |
