# Supplementary material for: Chromogranin A deficiency attenuates tauopathy by altering epinephrine–alpha-adrenergic receptor signaling in PS19 mice
Source: Springer Nature journal article supplement (doi:10.1038/s41467-025-59682-6), 2025-05-20
Supplement: MOESM2 [file 41467_2025_59682_MOESM2_ESM-1.pdf]

## Reporting Summary

Nature Portfolio wishes to improve the reproducibility of the work that we publish. This form provides structure for consistency and transparency in reporting. For further information on Nature Portfolio policies, see our [Editorial Policies](#) and the [Editorial Policy Checklist](#).

### Statistics

For all statistical analyses, confirm that the following items are present in the figure legend, table legend, main text, or Methods section.

| n/a                                 | Confirmed                                                                                                                                                                                                                                                                                      |
|-------------------------------------|------------------------------------------------------------------------------------------------------------------------------------------------------------------------------------------------------------------------------------------------------------------------------------------------|
| <input type="checkbox"/>            | <input checked="" type="checkbox"/> The exact sample size ( $n$ ) for each experimental group/condition, given as a discrete number and unit of measurement                                                                                                                                    |
| <input type="checkbox"/>            | <input checked="" type="checkbox"/> A statement on whether measurements were taken from distinct samples or whether the same sample was measured repeatedly                                                                                                                                    |
| <input type="checkbox"/>            | <input checked="" type="checkbox"/> The statistical test(s) used AND whether they are one- or two-sided<br><i>Only common tests should be described solely by name; describe more complex techniques in the Methods section.</i>                                                               |
| <input checked="" type="checkbox"/> | <input type="checkbox"/> A description of all covariates tested                                                                                                                                                                                                                                |
| <input type="checkbox"/>            | <input checked="" type="checkbox"/> A description of any assumptions or corrections, such as tests of normality and adjustment for multiple comparisons                                                                                                                                        |
| <input type="checkbox"/>            | <input checked="" type="checkbox"/> A full description of the statistical parameters including central tendency (e.g. means) or other basic estimates (e.g. regression coefficient) AND variation (e.g. standard deviation) or associated estimates of uncertainty (e.g. confidence intervals) |
| <input type="checkbox"/>            | <input checked="" type="checkbox"/> For null hypothesis testing, the test statistic (e.g. $F$ , $t$ , $r$ ) with confidence intervals, effect sizes, degrees of freedom and $P$ value noted<br><i>Give <math>P</math> values as exact values whenever suitable.</i>                            |
| <input checked="" type="checkbox"/> | <input type="checkbox"/> For Bayesian analysis, information on the choice of priors and Markov chain Monte Carlo settings                                                                                                                                                                      |
| <input checked="" type="checkbox"/> | <input type="checkbox"/> For hierarchical and complex designs, identification of the appropriate level for tests and full reporting of outcomes                                                                                                                                                |
| <input type="checkbox"/>            | <input checked="" type="checkbox"/> Estimates of effect sizes (e.g. Cohen's $d$ , Pearson's $r$ ), indicating how they were calculated                                                                                                                                                         |

*Our web collection on [statistics for biologists](#) contains articles on many of the points above.*

### Software and code

Policy information about [availability of computer code](#)

Data collection Keyence Fluorescence Microscope, UCSD Behavior core, UPLC, Biorad Chemidoc XR, Thermo Scientific TSQ 9610 GC-MS/MS, Novaseq S4, NIKON SoRa Spinning Disk Microscope

Data analysis Excel v16.55, Prism v10.4.1, Image Lab, Image J, Thermo Chromeleon software, FASTQC, Trimmomatic (v0.39), STAR (v2.7.10b), StringTie (v1.3.6), prepDE.py3, DESeq2 (v1.42.0), ggplot2 (v3.4.4), ClusterProfiler (v4.10.0)

For manuscripts utilizing custom algorithms or software that are central to the research but not yet described in published literature, software must be made available to editors and reviewers. We strongly encourage code deposition in a community repository (e.g. GitHub). See the Nature Portfolio [guidelines for submitting code & software](#) for further information.

### Data

Policy information about [availability of data](#)

All manuscripts must include a [data availability statement](#). This statement should provide the following information, where applicable:

- Accession codes, unique identifiers, or web links for publicly available datasets
- A description of any restrictions on data availability
- For clinical datasets or third party data, please ensure that the statement adheres to our [policy](#)

RNAseq data was deposited in GEO (GSE274459). Mouse reference mm10 was used. Human data was provided.

## Research involving human participants, their data, or biological material

Policy information about studies with [human participants or human data](#). See also policy information about [sex, gender \(identity/presentation\), and sexual orientation](#) and [race, ethnicity and racism](#).

|                                                                    |                                                                                                                  |
|--------------------------------------------------------------------|------------------------------------------------------------------------------------------------------------------|
| Reporting on sex and gender                                        | Sex was not considered in our study due to less sample size. Sex is mentioned in the table 1 and 2.              |
| Reporting on race, ethnicity, or other socially relevant groupings | N/A                                                                                                              |
| Population characteristics                                         | N/A                                                                                                              |
| Recruitment                                                        | Postmortem brain samples were obtained from UCSD ADRC (AD samples) and Mayo Clinic (CBD samples)                 |
| Ethics oversight                                                   | Since the samples were collected from post-mortem brain, this was exempted from UCSD Institutional Review Board. |

Note that full information on the approval of the study protocol must also be provided in the manuscript.

## Field-specific reporting

Please select the one below that is the best fit for your research. If you are not sure, read the appropriate sections before making your selection.

Life sciences  Behavioural & social sciences  Ecological, evolutionary & environmental sciences

For a reference copy of the document with all sections, see [nature.com/documents/nr-reporting-summary-flat.pdf](https://www.nature.com/documents/nr-reporting-summary-flat.pdf)

## Life sciences study design

All studies must disclose on these points even when the disclosure is negative.

|                 |                                                                                                                                                                                                                                                                                                                     |
|-----------------|---------------------------------------------------------------------------------------------------------------------------------------------------------------------------------------------------------------------------------------------------------------------------------------------------------------------|
| Sample size     | We used G*Power 3.1 to determine the sample size for in vivo studies that provided 95% power to detect differences of 20-30% between experimental group means at alpha = 0.05 using ANOVA and Sidak's post hoc tests. Sample sizes and Statistical analyses for all experiments are included in the figure legends. |
| Data exclusions | We did not exclude any data.                                                                                                                                                                                                                                                                                        |
| Replication     | For in vivo studies with mice, we performed more than 3 independent experiments using separate cohorts of animals to demonstrate reproducibility.                                                                                                                                                                   |
| Randomization   | Transgenic and knockout animals were randomized to treatment groups blindly by animal identifier and age to minimize bias and increase reproducibility.                                                                                                                                                             |
| Blinding        | Biochemical assays were conducted in a blinded manner. All experimental groups will be coded and the code unblinded after the completion of the study.                                                                                                                                                              |

## Reporting for specific materials, systems and methods

We require information from authors about some types of materials, experimental systems and methods used in many studies. Here, indicate whether each material, system or method listed is relevant to your study. If you are not sure if a list item applies to your research, read the appropriate section before selecting a response.

### Materials & experimental systems

| n/a                                 | Involvement in the study                                        |
|-------------------------------------|-----------------------------------------------------------------|
| <input type="checkbox"/>            | <input checked="" type="checkbox"/> Antibodies                  |
| <input type="checkbox"/>            | <input checked="" type="checkbox"/> Eukaryotic cell lines       |
| <input checked="" type="checkbox"/> | <input type="checkbox"/> Palaeontology and archaeology          |
| <input type="checkbox"/>            | <input checked="" type="checkbox"/> Animals and other organisms |
| <input type="checkbox"/>            | <input checked="" type="checkbox"/> Clinical data               |
| <input checked="" type="checkbox"/> | <input type="checkbox"/> Dual use research of concern           |
| <input checked="" type="checkbox"/> | <input type="checkbox"/> Plants                                 |

### Methods

| n/a                                 | Involvement in the study                        |
|-------------------------------------|-------------------------------------------------|
| <input checked="" type="checkbox"/> | <input type="checkbox"/> ChIP-seq               |
| <input checked="" type="checkbox"/> | <input type="checkbox"/> Flow cytometry         |
| <input checked="" type="checkbox"/> | <input type="checkbox"/> MRI-based neuroimaging |

## Antibodies

|                 |                                                                         |
|-----------------|-------------------------------------------------------------------------|
| Antibodies used | Immunohistochemistry:<br>AT8 (1:500), Thermo Fisher Science Cat# MN1020 |
|-----------------|-------------------------------------------------------------------------|

MC1 (1:500), Gift from P. Davies  
 CD68 (1:700), BIO-RAD Cat# MCA1957GA  
 GFAP (1:500), Cell Signaling Technology Cat# 3670  
 ADRA1B (1:500), Abcam, Cat# AB 169523  
 CgA (1:400) Invitrogen Cat# MA5-13093  
 NeuN (1:500) Proteintech 66836-1-Ig  
 MAP2 (1:400) Millipore-Sigma Cat#AB-5622  
 Anti-mouse Alexa Fluor 568 (1:300), Invitrogen Cat# A11031  
 Anti-rabbit Alexa Fluor 488 (1:300), Invitrogen Cat# A10042  
 Strep-Alexa Fluor 568 (1:500). Thermo Fisher Science Cat#S11226  
 Strep-Alexa Fluor 647 (1:500).Thermo Fisher Science Cat#S32357

#### Immunoblotting:

AT8 (1:3000), Thermo Fisher Science Cat# MN1020.  
 PHF1 (1:4000), Gift from P. Davies  
 CP13 (1:2000), Gift from P. Davies  
 HT7 (1:8000), Thermo Fisher Science Cat# MN1000  
 Actin (1:8000), Bio-Bharati, Cat# BB-AB0024  
 ADRA1B (1:2000), Abcam, Cat# AB 169523  
 ADRA2B (1:2000), Proteintech, Cat# 19778-1-AP  
 ADRB2 (1:2000), Cell Signaling Technology, Cat# 8513S  
 Alpha-Tubulin (1:6000), Cell Signaling Technology, Cat# 3873  
 CgA (1:2000) Invitrogen Cat# MA5-13093  
 Anti-Mouse-HRP (1:10000), Sigma, Cat# A0168  
 Anti-Rabbit-HRP (1:10000), Sigma, Cat# A0545  
 Strep-HRP (1:6000). Thermo Fisher Science Cat#N100

#### Validation

AT8, Thermo Fisher Science Cat# MN1020 (AT8 antibody has been used and cited in more than 200 publications and validated for immunoblotting and immunohistochemistry)  
 MC1, Gift from P. Davies (<https://www.alzforum.org/alzantibodies/tau-mc-1>)  
 CD68, BIO-RAD Cat# MCA1957GA (This antibody has been used in more than 200 publications and validated for IHC use)  
 GFAP, Cell Signaling Technology Cat# 3670 (GFAP antibody has been cited by more than 500 publications and validated for use in IHC)  
 ADRA1B, Abcam, Cat# AB 169523 (This antibody has been cited in more than 18 publications and validated for use in immunoblotting and immunohistochemistry)  
 CgA, Invitrogen Cat# MA5-13093. (Antibody has been cited by more than 20 publications and we have done immunohistochemistry where we did not get any signal from CgA-KO mice)  
 NeuN Proteintech 66836-1-Ig (This antibody has been used in more than 50 publications and is validated for IHC)  
 Anti-mouse Alexa Fluor 568, Invitrogen Cat# A11031 (Antibody has been used in more than 1000 publications and is being validated for immunohistochemistry)  
 Anti-rabbit Alexa Fluor 488, Invitrogen Cat# A10042 (Antibody has been used in more than 1000 publications and is being validated for immunohistochemistry)  
 Strep-Alexa Fluor 568. Thermo Fisher Science Cat#S11226 (This reagent has been cited more than 100 times and validated for use in immunohistochemistry)  
 PHF1, Gift from P. Davies (<https://www.alzforum.org/alzantibodies/tau-phf-1>)  
 CP13, Gift from P. Davies (<https://www.alzforum.org/alzantibodies/tau-cp-13>)  
 HT7, Thermo Fisher Science Cat# MN1000 (Antibody has been cited by more than 100 publications)  
 Actin, Bio-Bharati, Cat# BB-AB0024  
 ADRA2B, Proteintech, Cat# 19778-1-AP (The antibody is routinely tested by vendor for validation in immunoblotting)  
 ADRB2, Cell Signaling Technology, Cat# 8513S (The antibody is cited by 7 publications and validated by vendor for use in western blotting)  
 Alpha-Tubulin, Cell Signaling Technology, Cat# 3873 (The antibody is cited by more than 1000 publication and validated for use in western blotting)  
 Anti-Mouse-HRP, Sigma, Cat# A0168 (This antibody has been used for western blotting in more than 100 publications)  
 Anti-Rabbit-HRP (1:10000), Sigma, Cat# A0545 (This antibody has been used for western blotting in more than 100 publications)  
 Strep-HRP (1:6000). Thermo Fisher Science Cat#N100

## Eukaryotic cell lines

Policy information about [cell lines and Sex and Gender in Research](#)

|                                                                      |                                                                                                            |
|----------------------------------------------------------------------|------------------------------------------------------------------------------------------------------------|
| Cell line source(s)                                                  | ATCC #CRL-3275 (M. Diamond)                                                                                |
| Authentication                                                       | <a href="https://www.atcc.org/products/crl-3275">https://www.atcc.org/products/crl-3275</a>                |
| Mycoplasma contamination                                             | Negative                                                                                                   |
| Commonly misidentified lines<br>(See <a href="#">ICLAC</a> register) | <i>Name any commonly misidentified cell lines used in the study and provide a rationale for their use.</i> |

## Animals and other research organisms

Policy information about [studies involving animals](#); [ARRIVE guidelines](#) recommended for reporting animal research, and [Sex and Gender in Research](#)

|                         |                                                                                                                                                                                                                                                                                                                                                                                                                                                                                                                                                                                                                 |
|-------------------------|-----------------------------------------------------------------------------------------------------------------------------------------------------------------------------------------------------------------------------------------------------------------------------------------------------------------------------------------------------------------------------------------------------------------------------------------------------------------------------------------------------------------------------------------------------------------------------------------------------------------|
| Laboratory animals      | Chromogranin A knockout (CgA-KO) mice in B6 background were backcrossed to B6C3F1/J mice for 4 generations to generate CgA-KO mice in B6C3F1/J background. These mice were bred with hTau heterozygote mice from JAX (B6; C3-Tg(Prnp-MAPT*P301S)PS19Vle/J). CgA-Het/hTau-Het mice were bred with CgA-KO to generate CgA-KO/hTau mice. We used 4 different strains of mice: wild-type (B6C3F1/J), hTau ((B6; C3-Tg(Prnp-MAPT*P301S)PS19Vle/J), CgA-KO, and CgA-KO/hTau mice.                                                                                                                                     |
| Wild animals            | None                                                                                                                                                                                                                                                                                                                                                                                                                                                                                                                                                                                                            |
| Reporting on sex        | We used both male and female mice. We were not powered to detect sex differences.                                                                                                                                                                                                                                                                                                                                                                                                                                                                                                                               |
| Field-collected samples | None                                                                                                                                                                                                                                                                                                                                                                                                                                                                                                                                                                                                            |
| Ethics oversight        | Experiments were performed with approval from the University of California San Diego Institutional Animal Care and Use Committee (Animal Welfare Assurance Number A3033-1 or D16-00020), which complies with the Animal Welfare Act, the Guide for the Care and Use of Laboratory Animals, the Public Health Service Policy on Humane Care and Use of Laboratory Animals, the US Government Principles for the Utilization and Care of Vertebrate Animals Used in Testing, Research, and Training, and the ARRIVE (Animal Research: Reporting In Vivo Experiments) guidelines for reporting animal experiments. |

Note that full information on the approval of the study protocol must also be provided in the manuscript.

## Clinical data

Policy information about [clinical studies](#)

All manuscripts should comply with the ICMJE [guidelines for publication of clinical research](#) and a completed [CONSORT checklist](#) must be included with all submissions.

|                             |                                                                                                                          |
|-----------------------------|--------------------------------------------------------------------------------------------------------------------------|
| Clinical trial registration | <i>Provide the trial registration number from ClinicalTrials.gov or an equivalent agency.</i>                            |
| Study protocol              | <i>Note where the full trial protocol can be accessed OR if not available, explain why.</i>                              |
| Data collection             | <i>Describe the settings and locales of data collection, noting the time periods of recruitment and data collection.</i> |
| Outcomes                    | <i>Describe how you pre-defined primary and secondary outcome measures and how you assessed these measures.</i>          |

## Plants

|                       |                                                                                                                                                                                                                                                                                                                                                                                                                                                                                                                                                          |
|-----------------------|----------------------------------------------------------------------------------------------------------------------------------------------------------------------------------------------------------------------------------------------------------------------------------------------------------------------------------------------------------------------------------------------------------------------------------------------------------------------------------------------------------------------------------------------------------|
| Seed stocks           | <i>Report on the source of all seed stocks or other plant material used. If applicable, state the seed stock centre and catalogue number. If plant specimens were collected from the field, describe the collection location, date and sampling procedures.</i>                                                                                                                                                                                                                                                                                          |
| Novel plant genotypes | <i>Describe the methods by which all novel plant genotypes were produced. This includes those generated by transgenic approaches, gene editing, chemical/radiation-based mutagenesis and hybridization. For transgenic lines, describe the transformation method, the number of independent lines analyzed and the generation upon which experiments were performed. For gene-edited lines, describe the editor used, the endogenous sequence targeted for editing, the targeting guide RNA sequence (if applicable) and how the editor was applied.</i> |
| Authentication        | <i>Describe any authentication procedures for each seed stock used or novel genotype generated. Describe any experiments used to assess the effect of a mutation and, where applicable, how potential secondary effects (e.g. second site T-DNA insertions, mosaicism, off-target gene editing) were examined.</i>                                                                                                                                                                                                                                       |
